# Supplementary material for: Derivation of Kokumi G-glutamyl Peptides and Volatile Aroma Compounds from Fermented Cereal Processing By-Products for Reducing Bitterness of Plant-Based Ingredients
Source: Preprints.org preprint supplement (doi:10.20944/preprints202311.0020.v1), 2023-11-01
Supplement: Supplementary file 1 [file supplementary]

## Sheet: Table S1 
MS information
		Precursor		MS2 fragment used for Area	RT
peptide	formula	M+H	M+2H		Standard	Shifted in sample	Barley S1/BSG_0	Barley S1/BSG_4	Barley S1/BSG_8	Barley S1/BSG_12	Wheat bran S1/ barley _0	Wheat bran S1/ barley _4	Wheat bran S1/ barley_8	Wheat bran S1/ barley_12	Wheat bran S1/BSG_0	Wheat bran S1/BSG_4	Wheat bran S1/BSG_8	Wheat bran S1/BSG_12	Wheat bran S1/ barley_0	Wheat bran S2/ barley_4	Wheat bran S2/ barley_8	Wheat bran S2/ barley_12
g-EE	C10H16N2O7	277.1		242.1	14.5	14.8	54800	219000	421000	414000	0	7100	14000	8460	53100	1890000	1100000	229000	133000	524000	33600	181000
g-EV	C10H18N2O5	247.1		118.086	10.4	11.7	58054	8198369	17261092	23783788	3161	1337729	2884816	198485	915966	4747664	3015	0	27218	245183	2201529	10283220
g-EF	C14H18N2O5	295.1		166.086	9.2	10.6	0	0	0	0	0	0	0	0	142000	16200	141000	331000	41300	48500	2770	0
g-EL	C11H20N2O5	261.5		132.102	8.9	9 to 10	410000	727000	548000	2410000	246000	762000	349000	435000	600000	2430000	2210000	1480000	2000000	234000	457000	450000
g-EVG	C12H21N3O6	304.2		72.0806	10.3	11.4	393000	1350000	706000	1570000	156000	2310000	2720000	3090000	89400	139000	54800	57700	5050	31600	396000	1190000
g-ECG (reduced)	C10H17N3O6S	308.1		179.049	11.6	not found	0	0	0	0	0	0	0	0	0	0	0	0	0	0	0	0
g-ECG (oxidazed)			307.083	MS1 used	14.85	15	27495	95303	0	12335	87321	15007	57952	232145	5012920	608245	117687	53017	488571	203044	676831	430635
Table S1. MS information and the area per each peptide and sample over the time

## Sheet: Table S2
	0 week		4 weeks		8 weeks		12 weeks
Samples	Water (%)
wheat bran S2/ barley	42.85	±0.06	54.3133	±0.14	36.4867	±0.20	39.16	±0.07
wheat bran S1/ barley	63.1367	±0.09	29.7133	±0.31	48.65	±0.13	27.56	±0.23
wheat bran S1/BSG	44.52	±0.16	31.3967	±0.16	33.16	±0.4	35.3933	±0.22
Barley S1/BSG	36.8567	±0.12	58.1533	±0.16	29.86	±0.08	31.7767	±0.11
p-value	1.45705e-16		1.74305e-15		5.12019e-15		3.23278e-12
	Proteases activity
wheat bran S2/ barley	1.5492	±0.02	0.8277	±0.01	1.296	±0.01	1.0941	±0.02
wheat bran S1/ barley	1.0272	±0.01	1.2051	±0.01	1.2672	±0.01	1.7001	±0.02
wheat bran S1/BSG	1.3845	±0.01	1.6038	±0.02	2.4984	±0.05	1.2261	±0.01
Barley S1/BSG	1.2405	±0.01	0.8187	±0.03	0.9114	±0.01	0.7908	±0.01
p-value	1.35175e-10		2.77855e-11		1.94605e-12		3.67876e-11
	Reducing sugar (ppm)
wheat bran S2/ barley	84.8	±0.30	165.283	±0.12	48.4	±0.10	28.55	±0.18
wheat bran S1/ barley	194.6	±0.13	158.45	±0.20	185.717	±0.31	226.783	±0.11
wheat bran S1/BSG	24.9667	±0.06	2	±0.13	3.48333	±0.38	0.466667	±0.03
Barley S1/BSG	106.15	±0.01	14.3833	±0.03	32.3333	±0.20	14.5333	±0.23
p-value	1.66234e-21		4.05352e-23		2.1402e-20		2.8985e-23
	REDOX (mV)
wheat bran S2/ barley	0.823333	±0.06	216.667	±0.58	234	±0.90	181	±0.90
wheat bran S1/ barley	1443	±0.90	196	±0.90	229.333	±0.58	191	±0.90
wheat bran S1/BSG	184	±0.90	143.667	±0.58	0.87	±0.02	118	±0.90
Barley S1/BSG	1436	±0.90	190	±0.90	231.667	±0.58	184.667	±0.58
p-value	3.51395e-24		3.73035e-13		1.47211e-18		4.10875e-13
	pH
wheat bran S2/ barley	7.26667	±0.06	4.03333	±0.06	4.2	±0.06	6.56667	±0.06
wheat bran S1/ barley	6.86667	±0.06	4.53333	±0.06	4.46667	±0.06	6.86667	±0.06
wheat bran S1/BSG	6.63333	±0.06	7.13333	±0.06	9.06667	±0.02	9.43333	±0.06
Barley S1/BSG	6.33333	±0.06	3.33333	±0.06	3.26667	±0.06	5.36667	±0.06
p-value	3.01637e-07		3.30478e-12		2.90581e-14		2.57285e-12
	L*
wheat bran S2/ barley	34.677	±0.91	39.511	±0.84	39.949	±0.70	40.507	±0.98
wheat bran S1/ barley	42.479	±0.99	40.468	±0.69	29.893	±0.73	29.809	±0.92
wheat bran S1/BSG	38.499	±0.98	30.854	±0.86	21.087	±0.99	25.688	±0.70
Barley S1/BSG	41.41	±0.98	44.045	±0.63	36.656	±0.80	34.535	±0.63
p-value	2.23069e-19		5.95107e-30		4.1115e-23		8.49801e-31
	a*
wheat bran S2/ barley	5.909	±0.57	5.219	±0.81	6.928	±0.79	7.382	±0.44
wheat bran S1/ barley	4.376	±0.86	4.594	±0.64	5.105	±0.51	4.446	±0.46
wheat bran S1/BSG	5.33	±0.50	5.041	±0.91	5.781	±0.57	4.388	±0.28
Barley S1/BSG	4.293	±0.75	5.368	±0.89	3.208	±0.34	5.501	±0.83
p-value	3.06589e-06		0.190155		3.9035e-16		1.01002e-11
	b*
wheat bran S2/ barley	9.433	±0.80	12.122	±0.95	15.707	±0.93	18.35	±0.75
wheat bran S1/ barley	8.9	±0.97	9.7	±0.90	9.165	±0.88	6.475	±0.94
wheat bran S1/BSG	9.66	±0.89	8.768	±0.96	8.369	±0.95	3.573	±0.80
Barley S1/BSG	9.871	±0.90	14.655	±0.89	6.991	±0.83	13.029	±0.93
p-value	0.0936884		1.09232e-15		4.44106e-21		1.99438e-30
Table S2. Results of one-way ANOVA and post-hoc analysis (Tukey HSD) of physico-chemical measurements for each sample over time.
Legend: samples within the same column followed by different letters were significantly different (p<0.05),
Means and standard deviation are shown. N=3 for each measurement except n=10 for colour

## Sheet: Table S3
				Relative concentration (ug/L)2
Calculated RI1	Library RI	Retention time (min)	Putative Compounds	Barley S1/BSG_0	Barley S1/BSG_4	Barley S1/BSG_8	Barley S1/BSG_12	Wheat bran S1/ barley _0	Wheat bran S1/ barley _4	Wheat bran S1/ barley_8	Wheat bran S1/ barley_12	Wheat bran S1/BSG_0	Wheat bran S1/BSG_4	Wheat bran S1/BSG_8	Wheat bran S1/BSG_12	Wheat bran S1/ barley_0	Wheat bran S2/ barley_4	Wheat bran S2/ barley_8	Wheat bran S2/ barley_12	Method of identification4
			Acids
708	700	2.14	Propanoic acid	0	0.113611	0.197857	0.821641	0	4.21754	1.84992	1.39897	0	0	0	0	0	0	0	0	AB
963	949	7.56	Benzoic acid, 2-amino-4-methyl-	0	0.954654	1.27959	2.51903	0	0	0	0	0	0	0	0	0	0	0	0	AB
1205	1180	14.22	Octanoic acid	0	3.42697	0	4.37244	0	0	0	0	0.140905	0	0	0	0	0	0	0	AB
1968	1968	31.42	n-Hexadecanoic acid	0	11.7926	18.0907	11.1152	0	443.729	0	0	0	0	0	16.993	2.86959	0	3.43179	0	AB
2140	2133	33.75	9,12-Octadecadienoic acid (Z,Z)-	0	0	0	0	0	85.6835	0	14.4355	12.1727	2.91035	8.18538	0	0.324364	0	0	0	AB
2144	2144	33.81	9-Octadecenoic acid	0	0	0	0	0	0	0	0	2.3891	0	1.94866	0	0	0	0	0	AB
2364	2366	37.24	cis-13-Eicosenoic acid	0	0	0	0	0	6.77439	0	0.554963	0	0	0	0	0	0	0.123316	0.0820056	AB
			Alcohols	0	0	0	0	0	0	0	0	0	0	0	0	0	0	0	0
NA	625	1.51	1-Propanol, 2-methyl-	0.648349	0.588002	0.678695	0.335242	0	3.75501	2.05454	0.624724	0	0.122312	0	0	0.579594	0.483147	0.77966	0.347879	AB
730	736	2.45	1-Butanol, 3-methyl-	6.84149	11.3432	10.1627	8.09647	9.82524	0	0	0	8.68253	13.1563	25.9158	0	12.2281	10.1162	29.1013	7.52918	AB
982	980	8.09	1-Octen-3-ol	0.985813	0.279895	0	2.71394	10.973	19.571	14.5243	6.06269	18.0063	14.1184	26.2421	0	0.678082	12.3998	0.657921	1.07707	AB
1031	1030	9.52	1-Hexanol, 2-ethyl-	0.975233	5.98324	23.0022	11.9393	46.4218	36.8921	35.6519	26.0632	3.93091	15.6734	78.2881	94.8506	12.1374	2.1822	16.2488	11.8668	AB
1115	1116	11.96	Phenylethyl Alcohol	0	29.1727	74.7246	108.731	27.7748	1105.01	1065.24	494.37	16.3221	41.1701	0	0	19.2724	21.0691	105.803	68.9564	AB
1192	1188	13.84	Cyclohexanol, 5-methyl-2-(1-methylethyl)-, (1α,2α,5α)-	0	0	0	0	0	150.135	121.755	90.5236	0	0	0	0	0	7.92573	9.26223	0	AB
1198	1261	14.01	β-Ethylphenethyl alcohol	0	0	0	0	0	0	62.3539	36.8854	0	0	0	0	125.435	0	90.6189	35.4367	AB
			Aldehydes
NA	652	1.68	Butanal, 3-methyl-	0.843565	0	0	0	2.51841	0.69072	0.134671	0.30405	0.802601	0.123228	0	0	15.8165	0	0	0	AB
802	800	3.49	Hexanal	0.342516	0.986706	0.678143	0.991672	0	9.30049	5.84162	3.64824	0	0	0	0	0	0	0	0	AB
916	873	6.21	2-n-Butylacrolein	0	0	0	0	0	0	0	0	0	0	1.00808	0	8.76524	0	0	0	AB
961	962	7.49	Benzaldehyde	0	0	0	0	45.77	489.612	514.84	283.098	249.277	13.0897	0	0	48.4818	0	0	0	AB
1004	1003	8.75	Octanal	0	0.705369	0.439139	0	0	0	0	0	0	0	0	4.33365	0	0	0	0	AB
1062	1060	10.43	2-Octenal, (E)-	0	0	0	1.30756	0.449198	6.18642	8.41865	4.17303	0.891331	0	0	0	0	0	0	0	AB
1166	1150	13.21	2-Phenylpropenal	0	0	0	0	0	0	0	0	0	0	84.0412	53.7463	13.5302	0	0	0	AB
1272	1279	16.41	Benzeneacetaldehyde, α-ethylidene-	2.09969	0	0	0	11.9786	245.448	214.085	100.55	0.887241	0	0	0	0	0	0	0	AB
1278	1294	16.59	Benzaldehyde, 4-propyl-	0	0	0	0	0	0	0	0	0	0	0	0	796.266	322.882	213.696	44.822	AB
1484	1486	22.69	5-Methyl-2-phenyl-2-hexenal	0	3.92999	11.9469	0.726711	10.455	0	4.22667	2.79726	3.36063	2.03101	0.594224	0.599766	56.2562	1.40599	0	0	AB
1755	1772	28.15	3,5-di-tert-Butyl-4-hydroxybenzaldehyde	0	10.2496	17.034	1.56295	0.780408	0	2.79224	0	5.57331	3.19661	2.18864	0	8.04862	1.30728	0	0	AB
			Esters
710	708	2.17	n-Propyl acetate	0	0.131135	0.145238	0.265049	0	0	0	0	0	0	0	0	0	0	0.829698	0.594895	AB
756	752	2.75	Propanoic acid, 2-methyl-, ethyl ester	5.16119	1.64924	1.38401	0.670202	0	39.2578	24.8317	16.4881	0	0	0	0	0	1.2835	1.97355	1.02474	AB
768	771	2.99	Isobutyl acetate	0	0.917842	1.62457	1.02246	0	3.14413	1.33809	0	0	0	0	0	0	0	1.80411	2.55841	AB
847	849	4.51	Butanoic acid, 2-methyl-, ethyl ester	0.9727	1.06957	0.936855	1.37726	0	54.251	37.7026	26.1082	0	0	0	0	0	2.6717	5.23579	2.90746	AB
852	854	4.65	Butanoic acid, 3-methyl-, ethyl ester	0	0	0	0	0	20.0944	9.82822	13.2665	0	0	0	0	0	0.628207	3.34935	1.26812	AB
875	876	5.19	1-Butanol, 3-methyl-, acetate	0	19.0308	34.5033	27.0887	0	26.7607	24.7202	6.89068	0	0	0	0	0	0	25.5862	48.1618	AB
878	880	5.26	1-Butanol, 2-methyl-, acetate	0	1.82502	2.98851	1.35347	0	6.88199	2.44013	0	0	0	0	0	0	0	1.80052	8.61778	AB
1000	1000	8.61	Hexanoic acid, ethyl ester	0.882431	1.07148	1.75029	0	0	0	0	0	0	1.53522	19.3045	5.19288	0	0	0	0	AB
1058	1060	10.31	Pentanoic acid, 2-hydroxy-4-methyl-, ethyl ester	0	3.31689	2.88439	0.539721	0	0.856671	0	0.375318	0	0	0	0	0	0	6.63932	3.82936	AB
1069	1047	10.67	Isoamyl lactate	0	0.673521	0.642785	3.1791	0	7.41043	8.78236	5.43241	0	0	0	0	0	0	3.43716	2.24635	AB
1132	1126	12.33	Octanoic acid, methyl ester	0	0	0	0	0	0	0	0	0.55147	0	0	21.7444	2.14556	2.78066	0	0	AB
1197	1182	13.97	Butanedioic acid, diethyl ester	0.279689	0	0	0	0	81.5836	0	0	0	0	0	0	0	0	0	0	AB
1202	1218	14.13	2-Ethylphenol, O-acetyl-	0	0	0	0	0.36065	0	0	0	0.53155	0	0	0	0	0	0	0	AB
1211	1196	14.42	Octanoic acid, ethyl ester	0	0.682767	2.4997	0	0	8.22937	14.2655	4.00217	0.203085	0	0	0	0	0	8.65431	4.7427	AB
1235	1210	15.19	Nonanoic acid methyl ester	2.70335	12.2369	6.43881	0	3.16454	8.11825	27.9568	0	14.4322	37.5264	0	0	0	0	0	150.914	AB
1250	1246	15.68	Benzeneacetic acid, ethyl ester	17.17	22.2179	26.7288	6.45075	0	0	0	0	0	0	0	0	0	8.1702	0	0	AB
1263	1258	16.02	Acetic acid, 2-phenylethyl ester	0	89.6639	349.111	484.108	0	92.4267	85.5477	40.9196	0	0	0	0	0	10.7677	193.541	0	AB
1265	1300	16.14	Methyl α-chlorophenylacetate	0	0	0	0	0	18.5256	18.2502	26.453	0	0	0	0	0	0	0	522.039	AB
1296	1296		Nonanoic acid, ethyl ester	0	0	0	0	0	12.6623	15.7385	8.24302	0	0	0	0	0	0	0	0	AB
1321	1311	17.93	Methyl caprate	0	0.695614	1.06146	0	0.928696	0	0	0	1.81417	0	0	0.28612	0	0	0	0	AB
1324	1317	18.03	n-Butyric acid 2-ethylhexyl ester	0	0.854874	1.05074	1.89918	0	4.02459	0	0	0	0	0	0	0	0	0	0	AB
1345	1350	18.65	Propanoic acid, 2-phenylethyl ester	0	1.83439	0	0	0	4.28443	1.921	1.72852	0	0	0	0	0	0	0	0	AB
1353	1363	18.93	2(3H)-Furanone, dihydro-5-pentyl-	0	4.12058	4.75687	1.74023	0	4.84903	5.0965	2.27544	0	0	0.524333	4.84616	0	1.1553	11.2676	3.27229	AB
1377	1311	19.62	Ethyl trans-4-decenoate	0	0	4.24619	0	0	1.24331	1.13939	0.524829	0	0	0	0	0	0	0	0.63093	AB
1385	1393	19.86	Benzeneacetic acid, 2-methylpropyl ester	0	0	0	0	0	0	4.77868	1.66825	0	0	0	0	0	0	2.0405	0.656829	AB
1389	1396	19.98	Propanoic acid, 2-methyl-, 2-phenylethyl ester	0	0	0	0	0	16.0015	6.63097	3.48619	0	0	0	0	0	0	0	0	AB
1393	1359	20.12	8-Methylnonanoic acid, ethyl ester	0	0	0	0	0	1.11843	2.57729	0.539631	0	0	0	0	0	0	1.32312	0	AB
1394	1396	20.14	Decanoic acid, ethyl ester	0	0	3.68794	0	0	0	0	0	0	0	0	0	0	0.386469	0	0.837127	AB
1432	1436	21.23	Butanedioic acid, ethyl 3-methylbutyl ester	0	0	0	0	0	0	0	0	0	0	0	0	0	0	1.36464	0.496159	AB
1450	1448	21.73	Dimethyl phthalate	0	0.883903	2.7088	0.819618	0	0	0.955128	0	0.362632	2.23103	0.569228	0.426408	3.07591	0.437029	0.979717	0.596363	AB
1521	1499	23.6	1,2-Benzenedicarboxylic acid, ethyl methyl ester	0	0	0	0	0	0	0	0	0	6.30774	2.4804	2.09737	0	0	0	0	AB
1526	1512	23.71	Dodecanoic acid methyl ester	0	0	0	0	4.52145	2.48453	3.79946	1.51234	0.918797	0	0	0	0	0	0	0	AB
1573	1512	24.75	Cinnamate <ethyl-, (Z)->	0	0	0	0	0	0	0	0	0	0	0	0	0	0	0	0	AB
1587	1587	25.07	Diethyl Phthalate	0	294.934	0	101.242	29.7513	0	473.123	3.61801	354.204	557.399	316.109	0	615.909	194.835	7.04624	0	AB
1594	1595	25.22	Dodecanoic acid, ethyl ester	0	0	953.338	0	0	16.218	10.2421	4.54383	0	0	0	0	0	0	7.57108	8.38405	AB
1678	1678	26.82	γ-Dodecalactone	0	0	0	0	0	0	0	0	0	0	17.7772	0	0	0	0	0	AB
1688	1688	27.01	Diethyl azelate	0	0	0	0	0	0	0	0	0	0.79625	0	0	0.924472	1.38154	2.38013	0.97948	AB
1726	1712	27.67	Methyl tetradecanoate	1.24595	0	0	0	2.1135	4.06356	3.15484	2.02865	6.00875	1.1233	0	0	3.3604	2.72555	1.03381	0	AB
1743	1730	27.96	O-Acetylcitric acid triethyl ester	0	1.2316	7.85914	0.188618	0	0	2.5132	0	1.28963	0	0	0	1.14054	0.944549	0	0	AB
1790	1779	28.73	Methyl 13-methyltetradecanoate	0	0	0	0	0	0	0	0	0	0	0	0	0	2.9573	0	0	AB
1797	1794	28.85	Tetradecanoic acid, ethyl ester	0.773575	2.2522	2.13503	0.95386	0	35.7416	20.6563	0	0.642244	0.806897	0	0	0	11.2282	11.4811	8.97809	AB
1859	1965	29.81	Dibutyl phthalate	0	41.9985	83.8509	7.39511	3.62604	0	19.3986	7.42945	31.284	22.2073	24.2094	0	42.9428	20.7615	7.29242	0.736226	AB
1867	1814	29.93	Ethyl 13-methyl-tetradecanoate	0	0	0	0	0	1.01257	0	0.270623	0	0	3.0906	24.726	0	6.33628	5.67086	3.82707	AB
1906	1924	30.54	1,2-Benzenedicarboxylic acid, butyl 2-methylpropyl ester	0	0.892565	1.93401	0	0	0	0	0	0.514812	0	0	0	0.930539	0	0	0	AB
1927	1941	30.84	Hexadecanoic acid methyl ester	19.3694	5.29138	7.24958	7.49603	20.9652	78.8353	52.2057	44.2761	84.1529	17.437	3.46454	5.18729	46.9538	35.5642	22.9169	12.8286	AB
1973	1977	31.49	Ethyl 9-hexadecenoate	0	0	0	0	0	0	0	57.1733	31.5939	29.5956	64.944	0	0	20.7785	0	0	AB
1994	1993	31.79	Hexadecanoic acid, ethyl ester	7.75044	32.0285	14.0614	14.1965	0	473.733	198.744	138.648	0	3.065	0	0	1.82033	22.235	122.085	125.606	AB
2038	2006	32.39	Z)-Oxacyclopentadec-6-en-2-one	0	0	0	0	0	0	0	0	0	0	6.07845	1.86298	0	0	0	0	AB
2092	2092	33.14	9,12-Octadecadienoic acid (Z,Z)-, methyl ester	26.0432	3.43986	7.86741	5.5696	24.4744	90.9106	32.3188	52.0095	69.229	23.3799	11.6162	6.80983	43.3746	25.6993	23.3888	15.7651	AB
2099	2103	33.23	Elaidic acid methyl ester	4.99692	1.33223	0.916398	1.3045	3.29692	7.51105	7.77486	10.6369	16.1653	4.52061	2.88872	2.14722	10.2399	8.88548	3.19972	2.18968	AB
2129	2114	33.62	Methyl stearate	0	0	0.340698	0.173664	0.362101	0	0	0	1.63176	0	0	0.0883782	0.912985	2.07771	0	0	AB
2160	2162	34.02	Linoleic acid ethyl ester	19.1599	62.9418	29.7948	21.9933	0.117887	767.954	188.168	176.659	1.06103	11.2995	0	0.366276	1.85533	21.2147	161.838	150.51	AB
2166	2173	34.09	Ethyl Oleate	2.81582	0	0	4.4781	0	230.552	40.706	46.6481	0	2.64036	0	0.109194	0.524657	8.30037	36.5889	33.8077	AB
2185	2150	34.34	Butyl citrate	0	0	0	0	0	0	0	0	0	0.222636	0	0	0.272954	0	0	0	AB
2194	2195	34.47	Octadecanoic acid, ethyl ester	0.0541219	0.672593	0.248165	0.273079	0	62.1725	6.81506	9.79067	0	0	0	0	0	1.57318	6.07845	6.06971	AB
2243	2253	35.18	3-Methylbutyl hexadecanoate	0.0159408	0.111233	0	0.128146	0.0428497	15.595	1.55069	2.30239	0.199784	0	0.196251	0	0.124138	0.221435	0.384391	0.390008	AB
2253	2249	35.34	cis-11,14-Eicosadienoic acid methyl ester	0	0	0	0	0	3.10016	0.155663	0.68147	0	0.156058	0	0	0	0	0	0	AB
2302	2306	36.06	cis-Methyl 11-eicosenoate	0	0	0	0	0	0	0	0	0.254827	0.0951807	0.374772	0.176495	0	0	0	0	AB
2310	2292	36.21	n-Propyl 9,12-octadecadienoate	0	0	0	0	0	16.6009	0.624252	1.61907	0	0	0	0	0	0	0	0.0783429	AB
2413	2417	38.19	Pentyl linoleate	0	0.101913	0	0.063426	0	55.4689	1.46103	6.09524	0.520348	0.109634	0	0	0.170251	0.127885	0.147414	0.191513	AB
2419	2483	38.33	trans-9-Octadecenoic acid, pentyl ester	0	0	0	0	0	4.07558	0	0.882439	0.0880007	0	0	0	0	0	0	0	AB
2468	2471	39.32	4,7,10,13,16,19-Docosahexaenoic acid, methyl ester, (all-Z)-	0	0	0	0	0	0	0	0	0	0	0	0	2.01531	0	0	0	AB
2500	2501	39.93	Octan-2-yl palmitate	0	0	0	0	0	3.47812	0	0.597569	0.1618	0.033037	0.0937875	0.0908054	0	0	0	0	AB
2597	2600	40.66	Ethyl-docosanoate	0	0	0	0	0	3.55811	0	0.301259	0	0	0	0	0	0	0	0	AB
2672	2637	41.01	Undec-10-ynoic acid, tridec-2-yn-1-yl ester	0	0	0	0	0	5.91834	0	1.16493	0.153123	0	0	0	0	0	0	0	AB
2683	2696	41.06	Adipic acid, di(2-phenylethyl) ester	0	0	0	0	0	19.0737	0	2.1586	0	0	0	0	0	0	0	0	AB
NA	2700	41.3	1,3-Benzenedicarboxylic acid, bis(2-ethylhexyl) ester	0	0	0	0	0	3.20409	0	0	0.240489	0	0	0	0	0	0	0	AB
NA	2864	41.67	(9Z,12Z)-Phenethyl octadeca-9,12-dienoate	0	0	0	0	0	48.3575	0	5.81741	0	0	0	0	0	0	0	0	AB
NA	684	1.74	1-Propene, 3-propoxy-	0.173294	0	0	0	0	0	0.0712651	0.125064	0	0.0820789	0	0	0	0	0	0	AB
			Ketones
871	872	5.07	4-Heptanone	0	0	0	2.94554	0	0	0	0	0	5.78633	3.02259	1.29655	2.43754	7.12191	1.3958	0	AB
889	891	5.51	2-Heptanone	0	0	0	0	0	0	0	0	0	0	22.3697	13.1188	0	0	0	0	AB
1092	1092	11.36	2-Nonanone	0	0	0	0	0	0	0	0	0	0	20.3781	20.8653	0	0	0	0	AB
1177	1176	13.48	1-Propanone, 1-phenyl-	0	0	0	0	0	0	0	0	0	0	217.116	0	24.1619	0	0	0	AB
1496	1469	23.01	β-Ionone epoxide	0	1.9333	4.63867	0.326435	0	0	1.21944	0	1.19112	1.19476	0.63234	4.25829	0	0.419092	0	0	AB
1628	1635	25.88	Benzophenone	0.163822	0	5.47281	0	0	0	0	0	0.773437	1.11255	0	0	3.56794	0	0	0	AB
			Miscellaneous and hydrocarbons	0	0	0	0	0	0	0	0	0	0	0	0	0	0	0	0
NA	689	1.93	Butane, 1-methoxy-3-methyl-	0	0	0	0	0	0	0	0	0	0.923754	2.52354	1.09083	0	0	0	0	AB
721	742	2.31	1,3-Dioxolane, 2,4,5-trimethyl-	4.38641	0.425051	0.339197	0.343596	0	14.2027	11.5372	4.00836	3.53259	0	0	0	0	2.81546	11.0874	9.47219	AB
734	734	2.51	Pentane, 2,2,3-trimethyl-	1.19101	3.33477	1.11215	2.1035	0	77.403	83.2139	32.9836	0	8.51494	5.28292	0	0	2.65659	0	1.05127	AB
737	746	2.55	Disulfide, dimethyl	0	0	0	0	0	20.0888	18.2019	7.52875	0	0	13.2658	46.257	0	0	0	0	AB
748	742	2.69	1,3-Dioxolane, 2,4,5-trimethyl-	0	0	0	0	0	5.24283	1.72546	1.20423	0	0	3.50174	4.01799	0	1.39572	1.08631	0.188281	AB
1083	983	11.06	1,5-Dimethoxy-1,3,5-trimethyltrisiloxane	0	0	0	0	0	0	0	0	1.39379	0	0	0	10.8233	0	0	0	AB
1233	1229	15.13	Benzothiazole	0	0	9.00412	0	0	0	0	0	9.9886	0	0	0	36.3491	0	0	0	AB
1296	1295	17.16	Indole	0	36.25	0	0	0	0	0	0	0	0	322.022	0	0	0	0	0	AB
1306	1297	17.49	1-Tridecyne	0.267755	0.633977	0	0	0	0	0	0	0	0	0	0	0	0	0	0	AB
1373	1385	19.51	Biphenyl	0	3.45874	0	0	0	0	0	0	0	0	0	0	0	0	0	0	AB
1410	1407	20.59	4-Tetradecyne	0	6.38851	0	1.17678	0.772502	1.29746	7.61816	0.7902	4.54873	5.52542	0	0	0	2.26246	0.310073	1.27318	AB
1414	1407	20.71	2,4,7,9-Tetramethyl-5-decyn-4,7-diol	0.300263	0	0	0	0	2.34366	0	0	0	0	2.29134	1.50966	7.96382	0	0	0	AB
1463	1475	22.09	2,6-Di-tert-butyl-4-hydroxy-4-methylcyclohexa-2,5-dien-1-one	0	561.14	976.679	0	0	0	0	0	361.192	282.5	0	0	465.043	0	0	0	AB
1479	1450	22.54	13-Oxabicyclo[10.1.0]tridecane	0	0	0	0	0	0	0	0	0	0	3.06662	6.86395	0	0	0	0	AB
1493	1536	22.92	Cyclopentadecane	0	0	0	0.574557	0	0	0	0	0	0	0.54006	1.65171	0	0	0	0	AB
1498	1466	23.09	2,5-di-tert-Butyl-1,4-benzoquinone	0	4.14722	9.1499	0.417959	0	0	4.81902	0	3.70517	3.26842	7.78175	0	0	2.85331	0.815855	0	AB
1513	1518	23.42	1-Pentadecyne	0.430336	1.04493	0	0.549881	0	0.945746	0.739465	0.75337	0	0	0	0	0	0	0.484224	0.958102	AB
1549	1533	24.23	Thiophene, 2,5-bis(2-methylpropyl)-	0	1.93386	8.05366	0.38677	0	0	1.77207	0	1.78046	2.40947	0.990548	0	2.76159	0.722008	0	0	AB
1661	1665	26.51	1,8,11-Heptadecatriene, (Z,Z)-	0	0	0	0	0	0	0	0	0	0	14.3491	38.8898	0	0	0	0	AB
1670	1664	26.67	1-Hexadecyne	0	0	0	0	0	0	0	0	0	0	2.46663	11.8653	0	0	0	0	AB
1894	1893	30.36	9-Nonadecene	0	0	0	0	0	4.42296	1.80257	1.35973	0	0	0.877713	8.84873	0	2.91891	1.66228	1.3839	AB
NA	2914	41.52	Squalene	0	0	0	0	0	8.34997	0	0.619943	0.29934	0	0	0.511072	0	0	0	0	AB
			Phenols
1086	1090	11.17	Phenol, 2-methoxy-	0	5.57773	2.91554	0	0	0	0	0	0	78.9056	354.474	313.859	0	26.946	25.6784	8.54465	AB
1183	1180	13.64	Phenol, 2,3-dimethyl-	0	34.44	38.3732	29.0803	0	0	0	10.7422	0	116.413	0	193.739	0	28.5222	39.5383	14.8537	AB
1282	1282	16.7	Phenol, 4-ethyl-2-methoxy-	0	0	0	0	0	0	0	0	0	1848.73	4627.37	3154.36	0	0	0	0	AB
1309	1317	17.57	2-Methoxy-4-vinylphenol	0	0	0	0	0	67.9111	66.8637	25.5815	12.3741	0	0	0	0	188.922	424.118	98.7618	AB
1313	1315	17.68	Phenol, 4-(1-methylpropyl)-	0	0	0	0	0	0	0	0	0	585.461	0	0	559.086	0	0	0	AB
1347	1355	18.71	Phenol, 2-(1,1-dimethylethyl)-4-methyl-	0	0	5.83569	0.481678	0.178074	0	0.561344	0	1.31728	1.0818	0.3305	0	2.27554	0.447123	0	0	AB
			Pyrazines
1002	1004	8.64	Pyrazine, trimethyl-	0	0	0	0	0	9.58169	6.71384	4.69086	0.716993	0	92.2754	68.149	0	0	10.1991	4.95419	AB
1077	1082	10.89	Pyrazine, 3-ethyl-2,5-dimethyl-	0	0.743331	0.451551	0	0	0	0	0	0	0	17.852	6.45983	0	0	0	0	AB
1135	1131	12.48	Pyrazine, 3,5-dimethyl-2-propyl-	0	0	0	0	0	0	0	0	0	0	6.86848	6.27807	0	0	0	0	AB
1214	1207	14.49	Pyrazine, 2,5-dimethyl-3-(2-methylpropyl)-	0.141834	0	0	0	0.081248	0	0	0	0.126755	0	5.0911	2.90103	0	1.68956	0	0	AB
1656	1661	26.41	2(3H)-Furanone, dihydro-5-(2-octenyl)-, (Z)-	0	0	0	0	0	0	0	0	0	0	0	0	0	2.78896	0.985017	0	AB
Table S3. Volatile aroma compounds for samples and time.
Anova results and post-hoc test (Tukey HSD) for volatile aroma compounds for each miso sample over time. Legend: values followed by different letters in the same row were significantly different (p-value <0.05).
1Retention index based on Thermo TG-5SILMS column using C7-C27 as external references.
2Concentration expressed as equivalents of 2-methyl-3-heptanone (µg/L).
3Method of identification: A, by comparison of the MS spectra with the NIST library; B, by comparison of RI (Kovat indices). All compounds were identified by A and B methods.
Note: compounds with * show correlation with g-glutamyl peptides

## Sheet: Table S4
Do you like vegetables in general?	Bitterness intensity	Aftertaste intensity	Thickness intensity	Coating intensity
No	80.8964	72.2611	63.998	66.9944
Yes	47.8964	42.7611	34.623	35.7444
p-value	0.00257892	0.0189154	0.0100209	0.0351227
How often do you eat vegetables?	Bitterness intensity	Aftertaste intensity	Thickness intensity	Coating intensity
Rarely	69.2667	63.0333	55.6875	58.9417
Never	71.1726	57	46.4315	50.2917
A few times per week	52.75	52.5	45.8125	44.875
p-value	0.00257892	0.0189154	0.0100209	0.0351227
Table S4. Results of one-way ANOVA and post-hoc analysis (Tukey HSD) of intensity perception in a gLMS, for bitterness, aftertaste, thickness and coating
Legend: samples within the same column followed by different letters were significantly different (p<0.05),

## Sheet: Figure S1
Figure S1. Pearson's correlation plot among koji substrate, miso substrate, time, strain of microorganism, and physico-chemical characteristics.
The correlation was considered significant for p < 0.05 and correlation coefficient > 0.5. *** indicates p< 0.001.
Legend: g corresponds to gamma; * indicates p <0.05, ** indicates p< 0.01 and

## Sheet: Figure S2
Figure S2. Physicochemical characteristics during the miso fermentation.
L* luminosity vs pH. One-way ANOVA and post-hoc analysis (Tukey test) with 95% confidence levels

## Sheet: Figure S3
																						Code	Volatile aroma compound
																						1	Propanoic acid
																						2	Benzoic acid, 2-amino-4-methyl-
																						3	Octanoic acid
																						4	1-Propanol, 2-methyl-
																						5	1-Butanol, 3-methyl-
																						6	Phenylethyl Alcohol
																						7	Cyclohexanol, 5-methyl-2-(1-methylethyl)-, (1?,2?,5?)-
																						8	Hexanal
																						9	Benzaldehyde
																						10	Octanal
																						11	2-Octenal, (E)-
																						12	Benzeneacetaldehyde
																						13	Benzeneacetaldehyde, ?-ethylidene-
																						14	Propanoic acid, 2-methyl-, ethyl ester
																						15	Isobutyl acetate
																						16	Butanoic acid, 2-methyl-, ethyl ester
																						17	Butanoic acid, 3-methyl-, ethyl ester
																						18	Isoamyl lactate
																						19	Octanoic acid, methyl ester
																						20	Octanoic acid, ethyl ester
																						21	Nonanoic acid, ethyl ester
																						22	Methyl caprate
																						23	Propanoic acid, 2-phenylethyl ester
																						24	Benzeneacetic acid, 2-methylpropyl ester
																						25	Propanoic acid, 2-methyl-, 2-phenylethyl ester
																						26	8-Methylnonanoic acid, ethyl ester
																						27	1,2-Benzenedicarboxylic acid, ethyl methyl ester
																						28	Methyl tetradecanoate
																						29	Ethyl 13-methyl-tetradecanoate
																						30	Hexadecanoic acid methyl ester
																						31	Hexadecanoic acid, ethyl ester
																						32	9,12-Octadecadienoic acid (Z,Z)-, methyl ester
																						33	Elaidic acid methyl ester
																						34	Methyl stearate
																						35	Linoleic acid ethyl ester
																						36	Ethyl Oleate
																						37	Octadecanoic acid, ethyl ester
																						38	3-Methylbutyl hexadecanoate
																						39	cis-11,14-Eicosadienoic acid methyl ester
																						40	cis-Methyl 11-eicosenoate
																						41	n-Propyl 9,12-octadecadienoate
																						42	cis-9-Octadecenoic acid, propyl ester
																						43	Pentyl linoleate
																						44	trans-9-Octadecenoic acid, pentyl ester
																						45	2,4-Difluorobenzene, 1-benzyloxy-
																						46	2-Heptanone
																						47	2-Pentanone, 5-chloro-
																						48	2-Nonanone
																						49	2-Pentanone, 4-(1,3,3-trimethyl-7-oxabicyclo[4.1.0]hept-2-yl)-
																						50	Butane, 1-methoxy-3-methyl-
																						51	Pentane, 2,2,3-trimethyl-
																						52	1,3-Dioxolane, 2,4,5-trimethyl-
																						53	Benzene, 1,3-bis(1,1-dimethylethyl)-
																						54	Cyclopentadecane
																						55	1,8,11-Heptadecatriene, (Z,Z)-
																						56	1-Hexadecyne
																						57	2,2-Dimethyl-N-phenethylpropionamide
																						58	9-Nonadecene
																						59	Phenol, 2-methoxy-
																						60	Phenol, 2,3-dimethyl-
Figure S3. Pearson's correlation plot between g-glutamyl peptides, volatile aroma compounds and fermentation time.																						61	Phenol, 4-ethyl-2-methoxy-
The correlation was considered significant for p < 0.05 and correlation coefficient > 0.5.																						62	2-Methoxy-4-vinylphenol
Legend: g corresponds to gamma; * indicates p <0.05, ** indicates p< 0.01 and *** indicates p< 0.001.																						63	Phenol, 4-(1-methylpropyl)-
																						64	Pyrazine, trimethyl-
																						65	Pyrazine, 3-ethyl-2,5-dimethyl-
																						66	Pyrazine, 3,5-dimethyl-2-propyl-
																						67	Pyrazine, 2,5-dimethyl-3-(2-methylpropyl)-
